# Supplementary material
Source: Springer Nature journal article supplement (https://www.springermedizin.de/resource/supplementary/12889_2012_5259_MOESM1_ESM.pdf/9494956)
Supplement: MOESM1 [file 9494956]

Records identified through Medline, Psychinfo, Proquest, Cochrane library database search using keywords: self-poisoning, suicide attempt, attempted suicide, Sri Lanka, Ceylon  
(n=353)

Abstracts screened  
(n=353)

Records excluded (n=261)  
Studies

- on medical management of acute self-poisoning
- on accidental poisoning
- not based in Sri Lanka

Full-text articles assessed for eligibility  
(n=58)

Duplicates removed  
(n=34)

Studies retained  
(n=16)

Full-text articles excluded (n=42):

- did not provide data on intentional self-poisoning
- focused only on completed suicide

Eligible articles from bibliographies of already retrieved articles:  
(n=6)

Hand search of Ceylon Medical Journal  
(n=4)

Papers included in review  
(n=26 publications. n=23 studies)
